# Supplementary material for: Engineering plasmonic Ag/AgCl–polydopamine–carbon nitride composites for enhanced photocatalytic activity based on mussel chemistry
Source: Royal Society of Chemistry journal article supplement (doi:10.1039/c6ra24637k), 2016-01-01
Supplement: c6ra24637k1.pdf [file c6ra24637k1.pdf]

**Engineering plasmonic Ag/AgCl-polydopamine-carbon nitride  
composites for enhanced photocatalytic activity based on mussel  
chemistry**

Wei Li,<sup>a</sup> Guoxiang Zhang,<sup>ab</sup> Wenbo Sheng,<sup>a</sup> Changchang Dong,<sup>a</sup> Yu Dai<sup>a</sup>, Cuihua Li<sup>a</sup>,  
Rongjie Wang<sup>a</sup>, Yulin Shi,<sup>a</sup> Xuhong Guo<sup>ac</sup> and Xin Jia<sup>\*a</sup>

<sup>a</sup> School of Chemistry and Chemical Engineering/Key Laboratory for Green Processing of Chemical Engineering of Xinjiang Bingtuan, Key Laboratory of Materials-Oriented Chemical Engineering of Xinjiang Uygur Autonomous Region, Engineering Research Center of Materials-Oriented Chemical Engineering of Xinjiang Bintuan, Shihezi University, Shihezi 832003, People's Republic of China. E-mail: jiaxin@shzu.edu.cn

<sup>b</sup> Gansu Dayu Water-saving Group Co., Ltd, Jiuquan 735000, People's Republic of China

<sup>c</sup> State Key Laboratory of Chemical Engineering East China University of Science and Technology Shanghai 200237, People's Republic of China

\* Corresponding author. E-mail: jiaxin@shzu.edu.cn

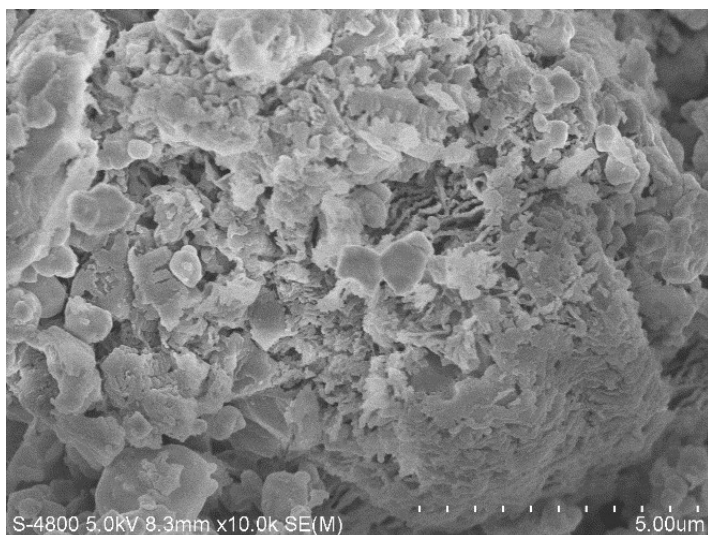

Figure S1. The SEM images of Ag/AgCl-CN.

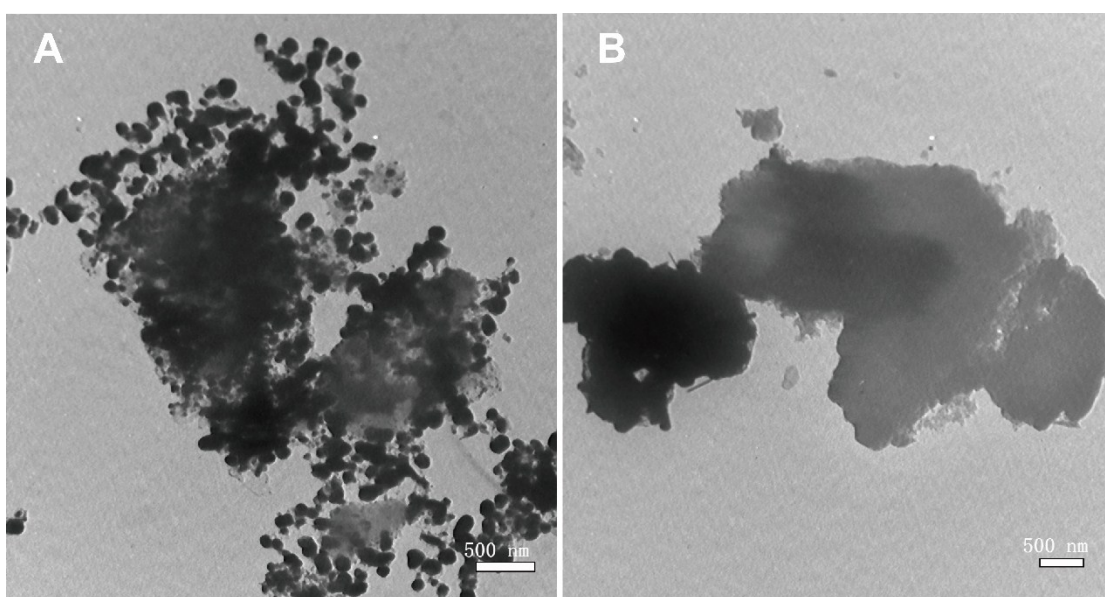

Figure S2. The TEM images of SPCN50 (A) and Ag/AgCl-CN (B) after ultrasonication for 1 h.

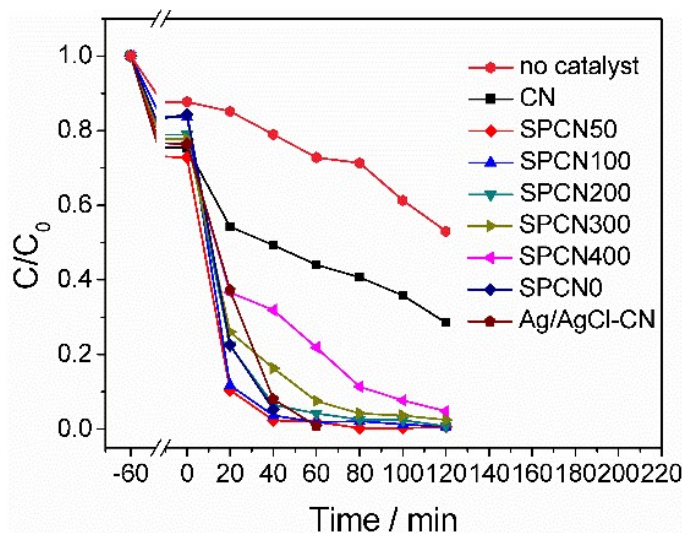

Figure S3. Photocatalytic degradation of Rh 6G (50 mL, 5 mg/L) over CN, P-Ag/AgCl, Ag/AgCl-CN and as-prepared SPCN (5 mg).

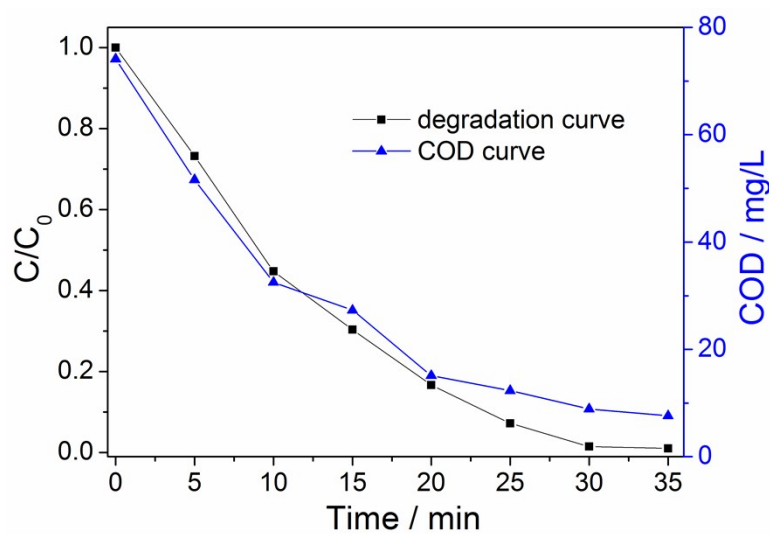

Figure S4. The COD curve of RhB degraded by SPCN50 under visible light. (The COD value was obtained by the  $\text{KMnO}_4$  method)

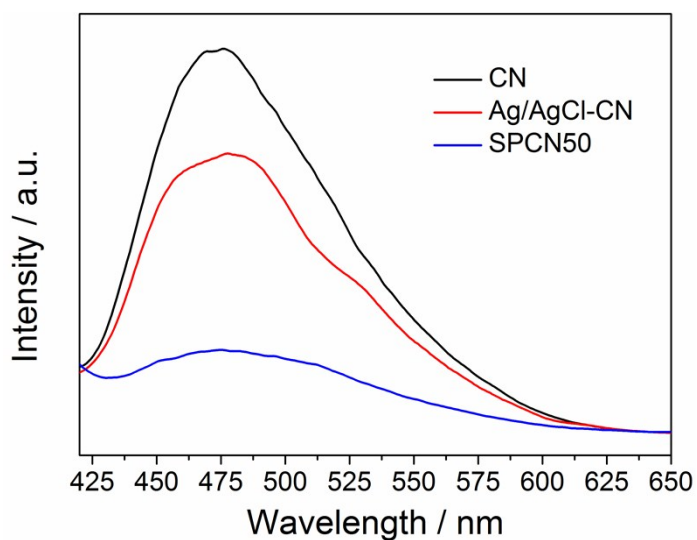

Figure S5. Room-temperature PL excitation and emission spectra of CN, Ag/AgCl-CN and SPCN50 ( $\lambda_{\text{ex}}=350$  nm).

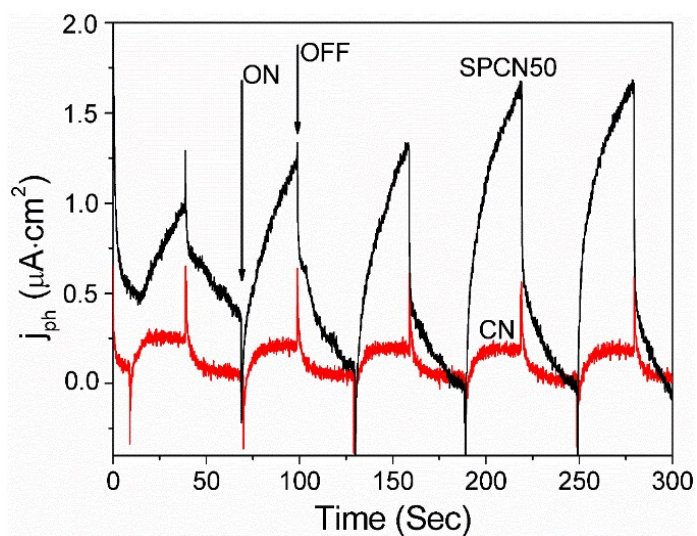

Figure S6. Photoresponses of CN and SPCN50 electrodes under the irradiation of visible light ( $\lambda > 420$  nm),  $[\text{Na}_2\text{SO}_4] = 0.1$  M.
